# Supplementary material
Source: publisher site journal article supplement (https://www.dovepress.com/article/412079)
Supplement: Supplementary file 1 [file get_supplementary_file.php]

## Supplemental Appendix

|                                                                                  | 1L                                                                 |      |                     |      | Post-1L                                                                                                                                   |      |                              |      |                                                                                                                                                               |      |                              |      |
|----------------------------------------------------------------------------------|--------------------------------------------------------------------|------|---------------------|------|-------------------------------------------------------------------------------------------------------------------------------------------|------|------------------------------|------|---------------------------------------------------------------------------------------------------------------------------------------------------------------|------|------------------------------|------|
|                                                                                  | Utilization over the 1-year period after initiating 1L therapy [1] |      |                     |      | Utilization over the 1-year period after completing 1L therapy in patients who have a complete/very good partial hematologic response [1] |      |                              |      | Utilization over the 1-year period after completing 1L therapy in patients who have a partial/no hematologic response, or the 1-year period after relapse [1] |      |                              |      |
|                                                                                  | Mayo 2012 stage 1/2 [2, 3]                                         |      | Mayo 2012 stage 3/4 |      | Without cardiac involvement                                                                                                               |      | With cardiac involvement [4] |      | Without cardiac involvement                                                                                                                                   |      | With cardiac involvement [4] |      |
|                                                                                  | Renal Involvement                                                  |      |                     |      | Renal Involvement                                                                                                                         |      |                              |      | Renal Involvement                                                                                                                                             |      |                              |      |
|                                                                                  | No                                                                 | Yes  | No                  | Yes  | No                                                                                                                                        | Yes  | No                           | Yes  | No                                                                                                                                                            | Yes  | No                           | Yes  |
| How many of the following tests does this type of patient have per year?         |                                                                    |      |                     |      |                                                                                                                                           |      |                              |      |                                                                                                                                                               |      |                              |      |
| Serum free light chains, serum protein electrophoresis, and serum immunofixation | 12.0                                                               | 12.0 | 12.0                | 12.0 | 4.0                                                                                                                                       | 4.0  | 6.0                          | 6.0  | 12.0                                                                                                                                                          | 12.0 | 12.0                         | 12.0 |
| Troponin and NT-proBNP                                                           | 4.0                                                                | 4.0  | 6.0                 | 9.0  | 2.0                                                                                                                                       | 2.0  | 4.0                          | 4.0  | 3.5                                                                                                                                                           | 3.5  | 6.0                          | 7.0  |
| EKG                                                                              | 2.0                                                                | 2.0  | 3.0                 | 3.5  | 1.0                                                                                                                                       | 1.0  | 1.5                          | 2.0  | 1.0                                                                                                                                                           | 1.0  | 2.5                          | 2.5  |
| Echocardiogram                                                                   | 1.0                                                                | 1.0  | 2.0                 | 2.0  | 1.0                                                                                                                                       | 1.0  | 2.0                          | 2.0  | 1.0                                                                                                                                                           | 1.0  | 2.0                          | 2.0  |
| How many patients out of 100 would be treated with the following in 1 year? [5]  |                                                                    |      |                     |      |                                                                                                                                           |      |                              |      |                                                                                                                                                               |      |                              |      |
| Daratumumab (dara) containing regimen                                            | 80.0                                                               | 90.0 | 92.5                | 92.5 | 20.0                                                                                                                                      | 25.0 | 42.5                         | 42.5 | 47.5                                                                                                                                                          | 50.0 | 50.0                         | 50.0 |
| Other non-dara containing chemotherapy                                           | 12.5                                                               | 11.0 | 12.5                | 12.5 | 7.5                                                                                                                                       | 10.0 | 10.0                         | 10.0 | 55.0                                                                                                                                                          | 55.0 | 60.0                         | 60.0 |
| Hematopoietic stem-cell transplantation                                          | 30.0                                                               | 30.0 | 5.0                 | 1.0  | 10.0                                                                                                                                      | 10.0 | 3.0                          | 0.5  | 22.5                                                                                                                                                          | 20.0 | 10.0                         | 5.0  |
| How many patients out of 100 would have the following in 1 year?                 |                                                                    |      |                     |      |                                                                                                                                           |      |                              |      |                                                                                                                                                               |      |                              |      |
| Bone marrow biopsy/aspiration                                                    | 25.0                                                               | 25.0 | 25.0                | 22.5 | 3.5                                                                                                                                       | 5.0  | 5.0                          | 5.0  | 50.0                                                                                                                                                          | 50.0 | 50.0                         | 50.0 |
| Pacemaker or Implantable Cardioverter Defibrillator (ICD) placement              | 1.0                                                                | 1.5  | 12.5                | 15.0 | 0.0                                                                                                                                       | 0.0  | 7.5                          | 10.0 | 0.0                                                                                                                                                           | 0.0  | 10.0                         | 10.5 |
| Heart transplant                                                                 | 0.0                                                                | 0.0  | 1.0                 | 0.5  | 0.0                                                                                                                                       | 0.0  | 1.5                          | 0.5  | 0.0                                                                                                                                                           | 0.0  | 2.5                          | 1.5  |
| Kidney transplant                                                                | 0.0                                                                | 0.0  | 0.0                 | 0.0  | 0.0                                                                                                                                       | 4.0  | 0.0                          | 1.0  | 0.0                                                                                                                                                           | 0.0  | 0.0                          | 0.0  |
| Carpal tunnel syndrome release                                                   | 3.0                                                                | 5.0  | 2.0                 | 4.0  | 1.0                                                                                                                                       | 5.0  | 1.0                          | 2.0  | 1.5                                                                                                                                                           | 5.0  | 2.0                          | 4.0  |
| Initiation of chronic dialysis                                                   | 0.0                                                                | 5.0  | 3.0                 | 7.0  | 0.0                                                                                                                                       | 5.0  | 1.0                          | 7.0  | 1.0                                                                                                                                                           | 10.0 | 1.5                          | 10.0 |
| Any amyloidosis related inpatient admissions                                     | 5.0                                                                | 12.5 | 45.0                | 55.0 | 0.0                                                                                                                                       | 5.0  | 15.0                         | 20.0 | 2.0                                                                                                                                                           | 15.0 | 30.0                         | 42.5 |
| Two or more amyloidosis related inpatient admissions                             | 3.5                                                                | 5.0  | 27.5                | 37.5 | 0.0                                                                                                                                       | 2.5  | 10.0                         | 10.0 | 1.0                                                                                                                                                           | 6.0  | 15.0                         | 20.0 |

### Notes:

[1] May or may not have an organ response to their 1L treatments.

[2] During 1L, non-advanced patients were those with Mayo stages 1/2 while advanced were those with Mayo stages 3/4. Post-1L, non-advanced patients were those without cardiac involvement while advanced were those with cardiac involvement. Additional utilization values are provided in supplemental appendix.

[3] Revised Mayo 2012 model: stage 1 troponin  $\geq 0.025$   $\mu\text{g/L}$ , NT-proBNP  $\geq 1800$  ng/L, dFLC  $\geq 180$  mg/L. For each stage, stage 1 is absence of any risk factors; stage 2 is presence of 1 risk factor; stage 3 is presence of 2 risk factors; and where applicable, stage 4 is all risk factors present.

[4] Elevated troponin and/or NT-proBNP.

[5] For each treatment, estimate the proportion of patients who are on this regimen regardless of the other treatments they may also be on.
